# Supplementary material for: Diverse manganese(ii) coordination polymers derived from achiral/chiral imidazolium-carboxylate zwitterions and azide: structure and magnetic properties
Source: Royal Society of Chemistry journal article supplement (doi:10.1039/c3dt50510c), 2013-01-01
Supplement: c3dt50510c.pdf [file c3dt50510c.pdf]

## Electronic Supplementary Information (ESI)

### Diverse Manganese(II) Coordination Polymers Derived from Achiral/Chiral Imidazolium-Carboxylate Zwitterions and Azide: Structure and Magnetic Properties

Xuan Wang, Xiu-Bing Li, Ren-He Yan, Yan-Qin Wang, En-Qing Gao\*

Shanghai Key Laboratory of Green Chemistry and Chemical Processes, Department of  
Chemistry, East China Normal University, Shanghai 200062, P.R.China; E-mail:

eqgao@chem.ecnu.edu.cn

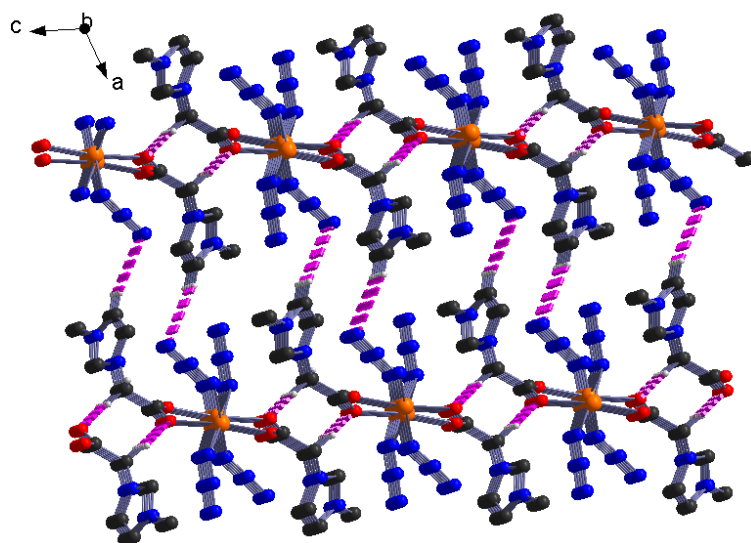

**Fig. S1** The hydrogen bonds (dotted lines) for **1**.

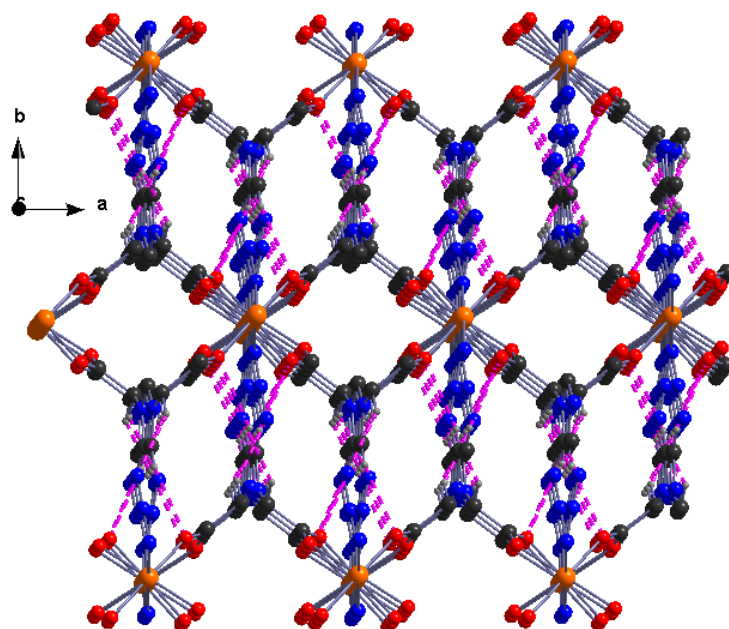

**Fig. S2** The hydrogen bonds (dotted lines) for **2**.

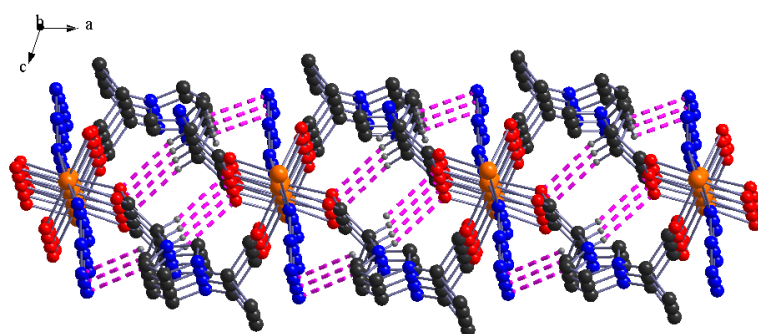

**Fig. S3** The hydrogen bonds (dotted lines) for **4**.
